# Supplementary material for: Consensus statement for treatment protocols in pressurized intraperitoneal aerosol chemotherapy (PIPAC)
Source: PubMed Central journal article supplement (PMC9069497; doi:10.1515/pp-2022-0102), 2022-03-01
Supplement: j_pp-2022-0102_suppl_001.pdf [file j_pp-2022-0102_suppl_001.pdf]

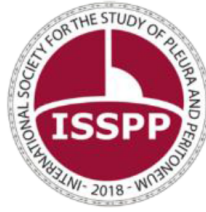

## Consensus meeting on PIPAC regimens

Paris 2<sup>nd</sup> and 3<sup>rd</sup> of July 2021

### Friday, July 2

|                                                       |                    |
|-------------------------------------------------------|--------------------|
| 13:00 Welcome and introduction                        | M. Hübner          |
| 13:15 PIPAC regimens: overview on status quo          | O. Sgarbura        |
| 13:30 How to define the optimal dose for chemotherapy | W. Pen             |
| 14:00 Pharmacology for dummies                        | K. van der Speeten |
| 14:30 Discussion Marc Pocard                          |                    |
| 16:00 PIPAC regimens: how we got started              | M.A. Reymond       |
| 16:30 Dox/Cis: the optimal dose                       | C. Tempfer         |
| 17:00 Dox/Cis: the optimal dose                       | M. Robella         |
| 17:30 Dox/Cis: status quo                             | O. Sgarbura        |
| 17:45 Discussion                                      | S.P. Somashekhar   |

### Saturday, July 3

|                                                           |                  |
|-----------------------------------------------------------|------------------|
| 9:00 PIPAC: latest news on pressure, temperature, e-PIPAC | M.A. Reymond     |
| 9:30 Discussion on PIPAC settings                         | C. Eveno         |
| 10:00 Alternative MMC                                     | M. Alyami        |
| 10:15 Alternative Irinotecan, Nab-Palmitaxel              | W. Ceelen        |
| 10:45 Alternative PIPAC regimens: status quo              | O. Sgarbura      |
| 11:00 Discussion                                          | W. Ceelen        |
| 13:30 PIPAC-Ox finding the optimal dose                   |                  |
| - Pharmacokinetic of e-PIPAC                              | K.P. Rovers      |
| - Odense                                                  | M. Mortensen     |
| - Singapore                                               | J. So            |
| - Turin                                                   | M. Robella       |
| - Drug resistance to Oxaliplatin                          | W. Pen           |
| 16:00 PIPAC-Ox: status quo and discussion                 | O. Sgarbura,     |
| 17:00 On-site and online voting on PIPAC drug regimens    | D. Cortes Guiral |
| 18:00 Discussion of results and outline of next steps     | M. Hübner        |
